# Supplementary material
Source: Springer Nature journal article supplement (https://www.springermedizin.de/resource/supplementary/12968_2012_3274_MOESM2_ESM.pdf/9583504)

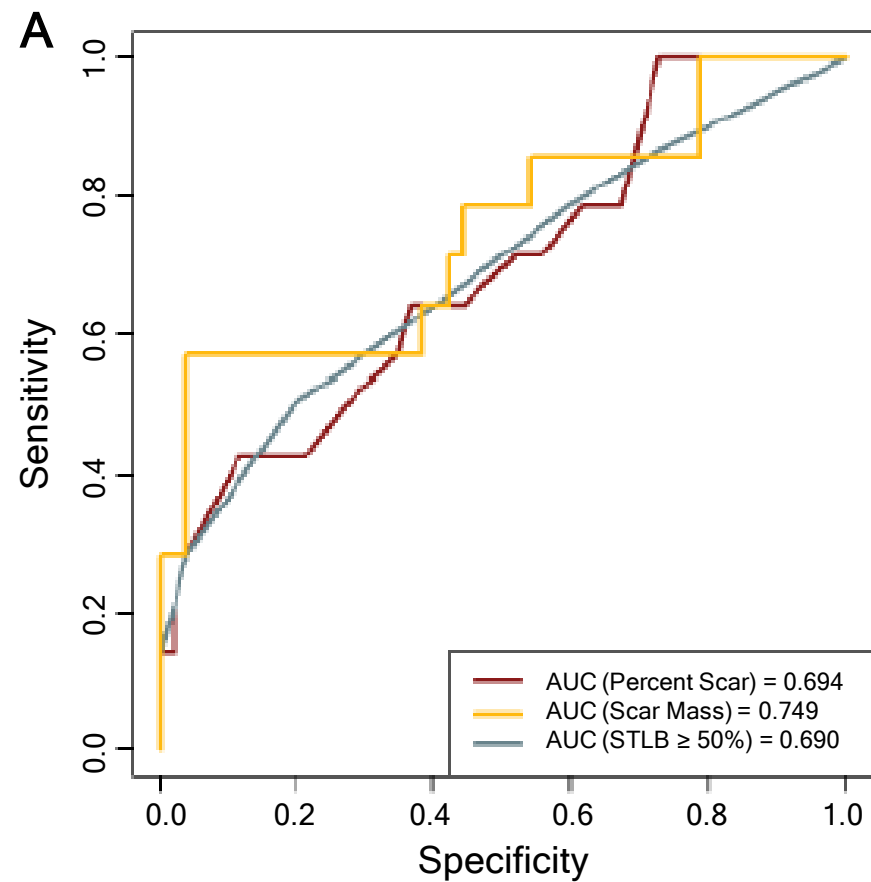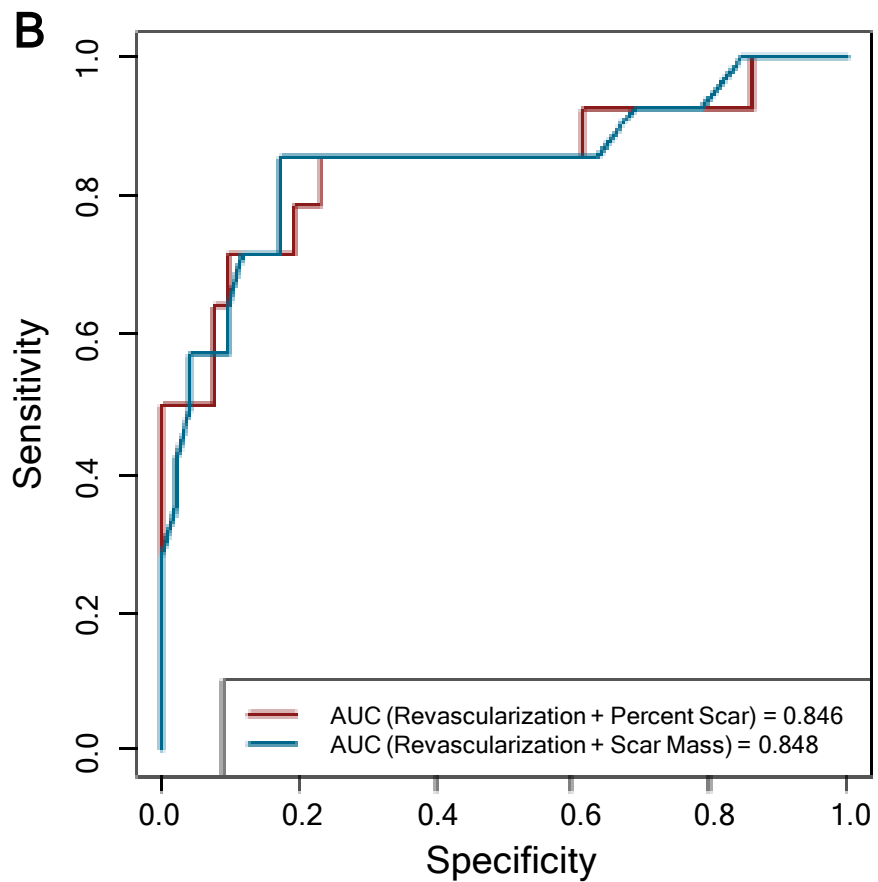

Supplement: MOESM2 [file 9583504]
